**REVIEW ARTICLE****Cortical superficial siderosis: detection and clinical significance in cerebral amyloid angiopathy and related conditions**

**Andreas Charidimou,<sup>1,2</sup> Jennifer Linn,<sup>3</sup> Meike W. Vernooij,<sup>4</sup> Christian Opherk,<sup>5</sup> Saloua Akoudad,<sup>4</sup> Jean-Claude Baron,<sup>6</sup> Steven M. Greenberg,<sup>2</sup> Hans Rolf Jäger<sup>1,7</sup> and David J. Werring<sup>1</sup>**

Cortical superficial siderosis describes a distinct pattern of blood-breakdown product deposition limited to cortical sulci over the convexities of the cerebral hemispheres, sparing the brainstem, cerebellum and spinal cord. Although cortical superficial siderosis has many possible causes, it is emerging as a key feature of cerebral amyloid angiopathy, a common and important age-related cerebral small vessel disorder leading to intracerebral haemorrhage and dementia. In cerebral amyloid angiopathy cohorts, cortical superficial siderosis is associated with characteristic clinical symptoms, including transient focal neurological episodes; preliminary data also suggest an association with a high risk of future intracerebral haemorrhage, with potential implications for antithrombotic treatment decisions. Thus, cortical superficial siderosis is of relevance to neurologists working in neurovascular, memory and epilepsy clinics, and neurovascular emergency services, emphasizing the need for appropriate blood-sensitive magnetic resonance sequences to be routinely acquired in these clinical settings. In this review we focus on recent developments in neuroimaging and detection, aetiology, prevalence, pathophysiology and clinical significance of cortical superficial siderosis, with a particular emphasis on cerebral amyloid angiopathy. We also highlight important areas for future investigation and propose standards for evaluating cortical superficial siderosis in research studies.

- 1 Stroke Research Group, Department of Brain Repair and Rehabilitation, UCL Institute of Neurology and The National Hospital for Neurology and Neurosurgery, Queen Square, London WC1N 3BG, UK
- 2 Stroke Research Centre, Massachusetts General Hospital, Boston, MA, USA
- 3 Department of Neuroradiology, University Hospital Munich, Marchioninistrasse 15, 81377 Munich, Germany
- 4 Department of Radiology and Department of Epidemiology, Erasmus MC University Medical Centre, Rotterdam, Netherlands
- 5 Institute for Stroke and Dementia Research, Ludwig Maximilians University, Munich, and Department of Neurology, SLK-Kliniken, Heilbronn, Germany
- 6 UMR 894 INSERM-Université Paris 5, Sorbonne Paris Cité, Paris, France
- 7 Lysholm Department of Neuroradiology, UCL Institute of Neurology and National Hospital for Neurology and Neurosurgery, London, UK

Correspondence to: Dr David J Werring,  
Reader in Clinical Neurology,  
Stroke Research Group,  
Department of Brain Repair and Rehabilitation,  
UCL Institute of Neurology,  
National Hospital for Neurology and Neurosurgery,  
Box 6, Queen Square,

London WC1N 3BG,  
UK  
E-mail: d.werring@ucl.ac.uk

**Keywords:** cerebral amyloid angiopathy; small vessel disease; cortical superficial siderosis; magnetic resonance imaging; intracerebral haemorrhage

**Abbreviations:** CAA = cerebral amyloid angiopathy; cSAH = convexity subarachnoid haemorrhage; cSS = cortical superficial siderosis; GRE = gradient recalled echo; ICH = intracerebral haemorrhage; SWI = susceptibility-weighted imaging

## Introduction

Siderosis—derived from the Greek word *sideros* meaning iron—refers to the deposition of iron-containing compounds in body tissues. Superficial siderosis of the CNS describes linear deposits of the blood-breakdown product haemosiderin within the subarachnoid space, the leptomeninges and the superficial layers of the cerebral or cerebellar cortices, or the spinal cord. For many years superficial siderosis could only be clearly identified at post-mortem, but with the recent advent of iron-sensitive MRI techniques, such as  $T_2^*$ -gradient recalled echo ( $T_2^*$ -GRE) or other susceptibility-weighted sequences, it can now be diagnosed *in vivo* as a characteristic low signal intensity (dark) rim around the outer surfaces of the brain or spinal cord. There are two types of siderosis, which differ with regard to underlying pathologies and clinical presentation. ‘Classical’ superficial siderosis of the CNS, first described in 1908 (Hamill, 1908), primarily affects the infratentorial regions and spinal cord, and typically presents with slowly progressive sensorineural hearing impairment, cerebellar ataxia and corticospinal tract signs. Although this form of superficial siderosis is assumed to be caused by chronic intermittent or continuous minor bleeding into the subarachnoid space, only in ~50% of cases is a definite bleeding source identified (e.g. tumours of the CNS, history of head trauma, or history of head or spinal surgery) (Fearnley *et al.*, 1995).

Within the past decade, a second type of brain siderosis restricted to the supratentorial compartment and the convexities of the cerebral hemispheres, has been identified and referred to as ‘cortical’ superficial siderosis (cSS) (Linn *et al.*, 2008). cSS has a different range of potential causes and clinical presentation to classical siderosis, but in older individuals is emerging as a key feature of cerebral amyloid angiopathy (CAA), a common and important age-related cerebral small vessel disorder (Linn *et al.*, 2010; Viswanathan and Greenberg, 2011; Charidimou *et al.*, 2012a). cSS is associated with characteristic clinical symptoms, including transient focal neurological episodes (Greenberg *et al.*, 1993), and might be a marker of future intracerebral haemorrhage (ICH) risk in CAA patients (Charidimou *et al.*, 2013c; Linn *et al.*, 2013). Thus, cSS has relevance to neurologists working in neurovascular, memory and epilepsy clinics, and neurovascular emergency services. Given the rapidly increasing interest and clinical relevance of cSS, in this focused review we discuss current

knowledge on neuroimaging and detection, differential diagnosis, prevalence, pathophysiology and clinical significance of cSS with an emphasis on CAA, and highlight areas for future investigation.

## Search strategy and selection criteria

References for this Review were identified by searches on PubMed between 1990 and February 2015, and references from relevant articles. The search terms ‘amyloid angiopathy’, ‘congoophilic angiopathy’, ‘CAA’, ‘cortical superficial siderosis’, ‘cSS’, ‘acute cSAH’, ‘fSAH’ and ‘convexity/convexal or focal subarachnoid h(a)emorrhage’ were used as keywords and MeSH headings. References were also identified from the bibliography of identified articles and the authors’ own files. Only papers published in English were considered. The final list of references was generated on the basis of relevance to the topics covered in this Review and discussed in the relevant sections.

## Neuroimaging of cortical superficial siderosis

The MRI appearance of cSS results from paramagnetic blood breakdown residues (including haemosiderin, a stable end-product of blood breakdown), which cause local magnetic field inhomogeneity resulting in signal loss on  $T_2^*$ -GRE and susceptibility-weighted imaging (SWI) sequences (Atlas *et al.*, 1988; Greenberg *et al.*, 1996; Haacke *et al.*, 2004) in a curvilinear pattern following the gyral cortical surface. The detection of cSS, like cerebral microbleeds and other paramagnetic lesions, depends on sequence type and parameters including spatial resolution, echo time, slice thickness, and field strength.

$T_2^*$ -GRE is a 2D sequence with a typical slice thickness in the order of 4 or 5 mm; the image contrast is dependent on the decay of transverse magnetization ( $T_2^*$  relaxation), due to a combination of spin-spin relaxation and magnetic field inhomogeneity. For cSS, no formal comparisons of rate of detection for varying  $T_2^*$ -GRE sequence parameters have been performed. Nevertheless, for other haemosiderin deposits such as microbleeds increased spatial resolution (e.g. thinner slices thickness or 3D acquisition), increased echo time (leading to more dephasing) of  $T_2^*$ -GRE sequences, and increased magnetic field strength lead to increased visualization of the areas of signal loss (Vernooij *et al.*, 2008; Gregoire *et al.*, 2010).

The SWI sequence uses a 3D acquisition, with a typical slice thickness of 1–2 mm and high in-plane resolution, which generates both ‘phase’ and ‘magnitude images’. SWI exploits additional information from filtered phase images, which reflect local susceptibility changes between neighbouring tissues. The multiplication of ‘magnitude images’ with filtered phase images yields ‘susceptibility-weighted’ images which accentuate the visibility of paramagnetic substances such as haemosiderin (Haacke *et al.*, 2009). In addition the SWI images can be displayed as minimum intensity projections (mIP), which produces thicker section (e.g. 10-mm thick) images to further increase the conspicuity of blood products and of cerebral veins. The generation of SWI images is illustrated in Fig. 1C–E. Generally susceptibility effects are more pronounced on studies acquired at 3 T compared to those acquired at 1.5 T (Stehling *et al.*, 2008), which benefits the detection of cerebral microbleeds and cSS, but is also associated with the comparatively small drawback of increased susceptibility artefacts near the skull base.

There have been a few studies comparing T<sub>2</sub>\*-GRE and SWI for detection of cerebral microbleeds in patients with memory impairment (Goos *et al.*, 2011), dementia

(Shams *et al.*, 2015) and CAA (Nandigam *et al.*, 2009; Cheng *et al.*, 2013). All of these showed SWI to have superior sensitivity to T<sub>2</sub>\* GRE, with almost double the prevalence of microbleeds in one study (Goos, 2011). A formal systematic comparison between T<sub>2</sub>\* and SWI for detection of cSS has not yet been published but our current clinical experience also suggests that SWI may well be superior (Fig. 1). The ability to produce minimum intensity projection images with SWI has the advantage that cortical veins, which can be a mimic of cSS, are more readily visualized. cSS is typically not detected on T<sub>1</sub>-weighted (unless there has been a subacute bleed); occasionally, T<sub>2</sub>-weighted MRI might show some evidence of cSS.

### Relationship between acute convexity subarachnoid haemorrhage and cortical superficial siderosis on neuroimaging

In most instances, cSS is hypothesized to result from previous acute convexity subarachnoid haemorrhage (cSAH)

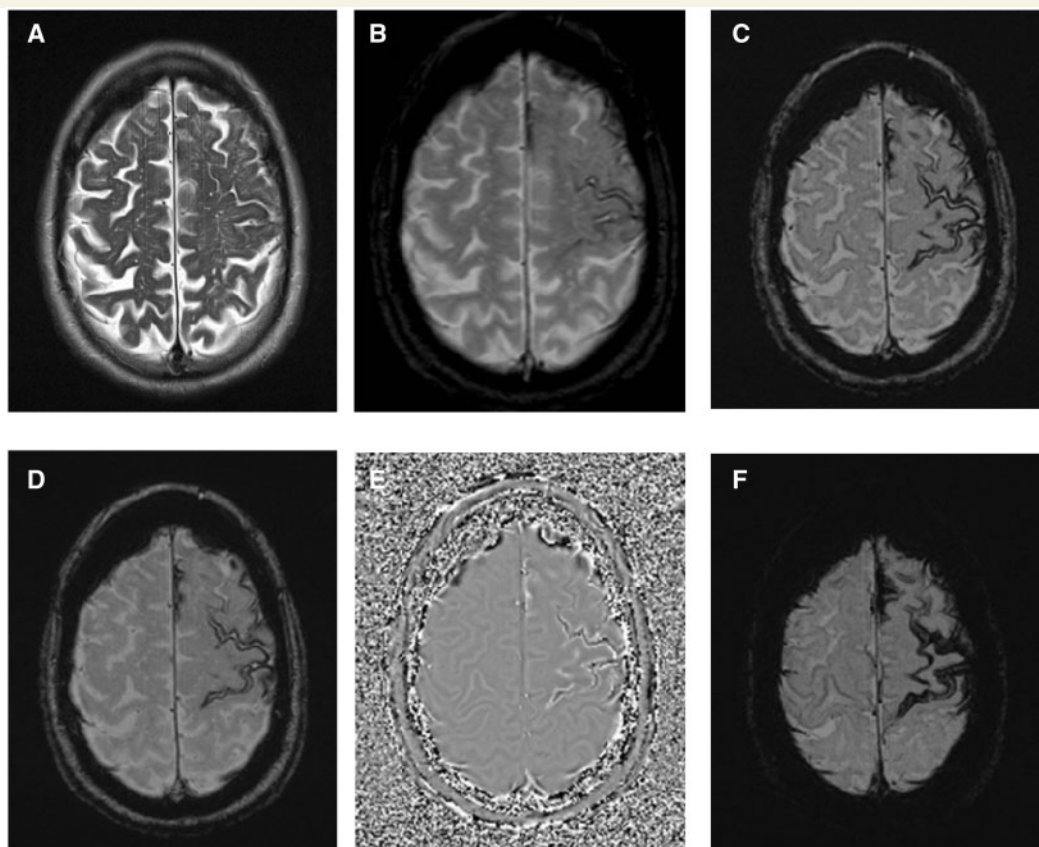

**Figure 1** Detection of cSS on different MRI sequences. Axial slices through superior cerebral convexity in a patient with probable CAA. The T<sub>2</sub>-weighted image (A) shows no cSS, while the T<sub>2</sub>\*-GRE (B) shows cSS as curvilinear low signal intensity areas on the surface of the left frontal gyri. SWI imaging (C–F): susceptibility-weighted image (C) is produced by the magnitude image (D) multiplied with a filtered phase image (E), which demonstrates more widespread and more conspicuous cSS than the T<sub>2</sub>\*-weighted GRE (B). The conspicuity of the cSS and of cortical veins is further enhanced in the minimum intensity projection image (F).

(Linn *et al.*, 2008, 2010), which may be visualized in the acute phase as high density within the subarachnoid space on CT, or high signal on proton-density or fluid attenuated inversion recovery (FLAIR) MRI. As the acute blood products are further degraded over time (weeks to months), blood residues (typically haemosiderin stored in macrophages; Oehmichen and Raff, 1980) are deposited in the superficial cortical layers. This process results in a bilinear ‘track-like’ appearance with cSS on either side of a cerebral sulcus in subacute and chronic stages (Fig. 2) (Linn *et al.*, 2008, 2010). Consequently, appropriate imaging can show different time points of the same pathophysiological processes, providing information about the timing, as well as pattern, of bleeding events. At present there are few studies on the neuropathology of cSS but it is most likely that depending on its age or stage of evolution, cSS reflects haemosiderin deposition within macrophages in the leptomeninges or superficial cerebral cortex (Koeppen and Barron, 1971; Feldman *et al.*, 2008; Koeppen *et al.*, 2008).

## Terminology and operational criteria for cortical superficial siderosis detection

Many different terms have been used to describe similar lesions including ‘subarachnoid haemosiderosis’, ‘superficial cortical haemosiderosis’, ‘sulcal siderosis’, ‘superficial cortical siderosis’, ‘convexity SAH’, ‘convexal SAH’, ‘cortical SAH’, and ‘focal subarachnoid bleeding’. In line with the recent Standards for Reporting Vascular changes on neuroimaging (STRIVE) initiative (Wardlaw *et al.*, 2013), we suggest that the standardized term ‘cortical superficial siderosis (cSS)’ is used to describe neuroimaging evidence of chronic blood products in either the superficial (subpial) layers of the cerebral cortex, within the subarachnoid space (sometimes called ‘sulcal siderosis’), or both. For acute blood products in the subarachnoid space of cortical sulci, we recommend the term ‘acute convexity subarachnoid haemorrhage (acute cSAH)’. We also advocate description of the extent of cSS, e.g. focal cSS (restricted to

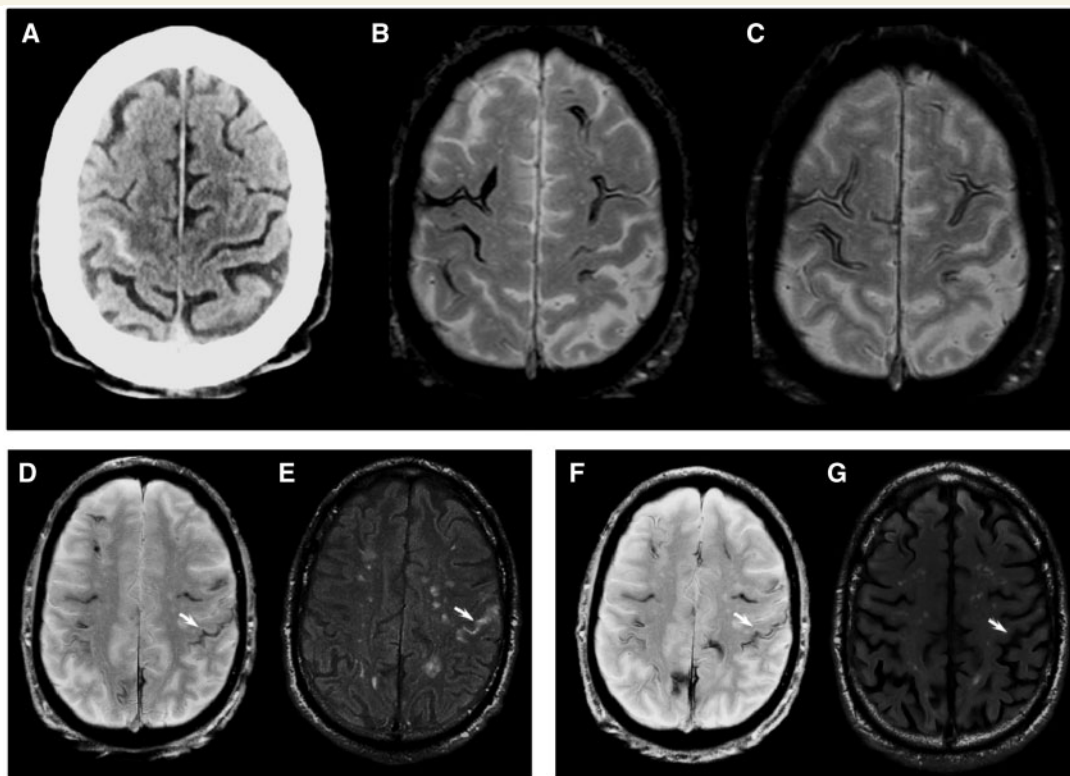

**Figure 2** Evolution of acute cSAH into cSS over time in two separate patients with CAA. Axial unenhanced CT (A) and axial T2\*-GRE magnetic resonance images (B and C) in a patient with probable CAA illustrate the evolution of acute cSAH into cSS. Acute cSAH corresponds to hyperdensity in sulci on CT (A). The MRI shown in B was performed 1 day after the CT (A). In the chronic stage, cSS forms a characteristic bilinear ‘track-like’ appearance on the 6 month follow-up axial T2\*-weighted magnetic resonance image (C). This pattern is caused by the signal intensity of the normal-appearing subarachnoid space in the middle, bordered bilaterally by the linear haemosiderin deposits in the superficial layers of the adjacent cortex. Panels D–G show images from a separate patient with an acute cSAH in the left central sulcus [linear hypointense signal within the subarachnoid space on the axial T2\*-GRE image (D, arrow) and hyperintense signal on FLAIR MRI image; E, arrow]. At 6-months follow-up (F and G), cSS again presents with a bilinear appearance on T2\*-GRE (F) while no sulcal hyperintensity is visible on FLAIR-MRI (G, arrow). Note pre-existing multifocal areas of chronic cSS in the baseline examination, representing probable residues of prior acute cSAHs.



three or fewer sulci) and disseminated cSS (affecting at least four sulci) in line with the modified Boston criteria (Linn *et al.*, 2010) and with potential prognostic relevance (Charidimou *et al.*, 2013c). We recommend that radiological reports should differentiate clearly between cSS and ‘classical’ (infratentorial) superficial siderosis of the CNS, which affects predominantly the infratentorial compartment (posterior fossa, brain stem and spinal cord) and basal cisterns, though may also extend supratentorially (Kumar *et al.*, 2006) (Fig. 3A) due to the differences in causes, clinical features and prognosis.

## ‘Mimics’ of cortical superficial siderosis

Suggested criteria for cSS identification and differentiation between true cSS and its ‘mimics’ are shown in Box 1. Most cSS ‘mimics’ contain deoxygenated blood or blood

degradation products (e.g. cortical veins, thrombosed vessels, or haemorrhagic transformation of ischaemic lesions), but similar appearances may occasionally be unrelated to blood or its products (e.g. mineralization). Due to paramagnetic deoxy-haemoglobin in venous blood, cerebral veins appear markedly hypointense on susceptibility-sensitive sequences (Reichenbach *et al.*, 1997) but, unlike cSS, do not consistently run parallel to convexity sulci and superficial cortical layers, and can be followed into a draining vessel, especially using SWI minimum intensity projection images (Haacke *et al.*, 2011). Cortical vein thrombosis typically causes a pronounced ‘blooming effect’ on susceptibility-sensitive sequences, yielding a tubular aspect on slices parallel to the thrombosed vein, and a round to oval cross section on slices perpendicular to it (Fig. 3B) (Linn *et al.*, 2010a, b).

Haemorrhagic transformation of cortical infarcts can have a linear or serpiginous appearance, usually associated with more extensive parenchymal damage deep to the cortex, with acutely restricted diffusion and gliosis on FLAIR and T<sub>2</sub>-weighted images in the chronic stage. Cortical laminar necrosis from hypoxic-ischaemic injury has a characteristic band-like appearance (hyperintense on T<sub>1</sub>-weighted images and hypointense on SWI and T<sub>2</sub>\*-weighted sequences). Sometimes very superficial clusters of multiple cerebral microbleeds can be mistaken for cSS, but these may be distinguished by their irregular, rather than smooth and curvilinear, appearance. Previous chronic lobar ICH can also cause cSS, but in this case, haemosiderin in the sulci is usually contiguous with parenchymal damage, visible on T<sub>2</sub>-weighted and FLAIR MRI; review of the clinical history and previous images can also be helpful.

Hypointensity due to mineralization (e.g. calcium) may be linear and cortical (e.g. as in Sturge-Weber syndrome), mimicking cSS, but can be easily distinguished on unenhanced CT (Fig. 3C and D); phase and magnitude information from SWI can also distinguish diamagnetic mineralization from paramagnetic haemosiderin (Mittal *et al.*, 2009; Wu *et al.*, 2009).

## Causes of cortical superficial siderosis and acute convexity subarachnoid haemorrhage

In patients presenting with an acute cSAH or with cSS, recent or prior head trauma should first be excluded. Non-traumatic causes should then be considered. CAA is consistently the most likely aetiology of acute cSAH and cSS in older patients (e.g. over 60 years of age), whereas reversible cerebral vasoconstriction syndrome is most likely in younger patients (Kumar *et al.*, 2010; Linn *et al.*, 2010; Khurram *et al.*, 2014), though the number of studies is small, and the prevalence of these and other causes remains uncertain. Reversible cerebral vasoconstriction syndrome is a clinical-radiological syndrome (Ducros, 2012) defined as: (i) acute severe (‘thunderclap’) headache at onset with or

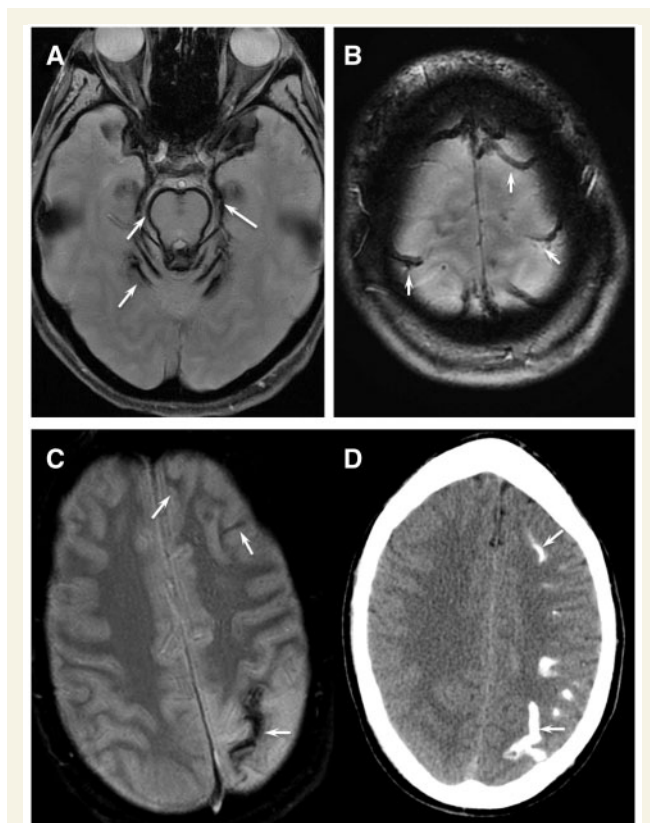

**Figure 3** Differential diagnosis and mimics of cSS and acute cSAH. (A) A 42-year-old patient with infratentorial superficial siderosis of the CNS (arrows) caused by clinically silent persistent small bleeds into the subarachnoid space following cranial surgery. (B) A 34-year-old patient with thrombosis of the cortical veins and the superior sagittal sinus (white arrows). (C and D) A 30-year-old patient with Sturge-Weber-syndrome. On T<sub>2</sub>\*-GRE sequence (C) the cortical calcifications appear as linear hypointense signals (arrows), similar to superficial siderosis. Unenhanced CT (D) allows the correct diagnosis of cortical calcifications (arrows) based on their marked high density.

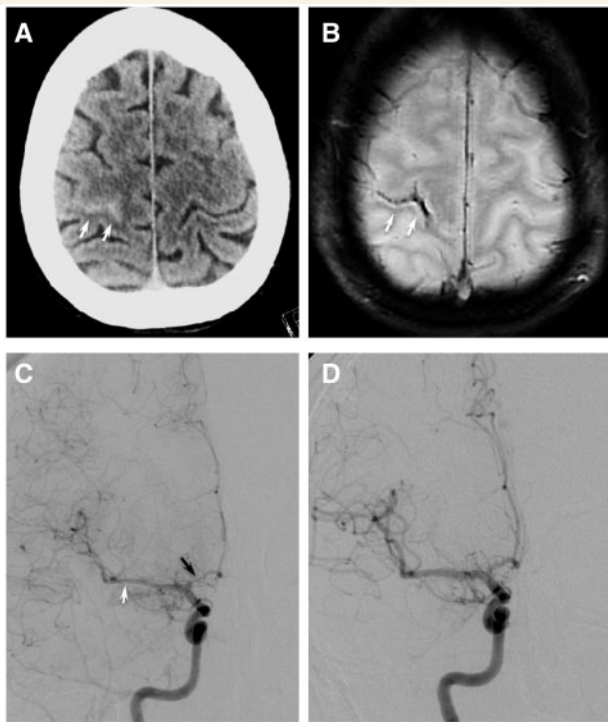

**Figure 4 Reversible cerebral vasoconstriction syndrome.** Unenhanced CT (A) and T<sub>2</sub>\*-GRE (B) show an acute cSAH in the right central sulcus in a 38-year-old patient who presented with thunderclap headache. Digital subtraction angiography after catheterization of the right internal cerebral artery (C) depicts severe narrowing of the right middle and anterior cerebral arteries (arrows). Follow-up digital subtraction angiography after intra-arterial infusion of nimodipine shows a normalization of the vessel diameters in response to nimodipine (D) supporting vasospasm as the mechanism.

without focal neurological symptoms; (ii) angiographically documented multifocal cerebral vasoconstriction; and (iii) reversibility of vasoconstriction within 3 months (Fig. 4). Known triggers include vasoactive (including sympathomimetic) substances, pregnancy or recent childbirth, but in more than one-third of patients no predisposing cause can be identified (Ducros *et al.*, 2007, 2010). Long-term prognosis is often favourable and determined largely by the occurrence of stroke, although <5% of the patients develop life-threatening stroke and case-fatality is <1% (Ducros, 2012). By contrast, aneurysmal rupture typically causes larger SAHs involving the basal cisterns and the interhemispheric fissure, and only rarely causes acute cSAH from a ruptured small peripheral aneurysm (Cuvinciuc *et al.*, 2010).

Less common causes of non-traumatic acute cSAH and cSS include primary angiitis of the CNS, infective endocarditis (Goulenok *et al.*, 2013), hyperperfusion syndrome after revascularization (carotid stenting or carotid endarterectomy), dural arteriovenous fistulae, and cortical venous thrombosis (Cuvinciuc *et al.*, 2010; Panda *et al.*, 2010;

Beitzke *et al.*, 2011; Field and Kleinig, 2011; Mas *et al.*, 2013; Geraldles *et al.*, 2014). The diagnosis of primary angiitis of the CNS is very challenging, but clinical history, CSF analysis, irregularities of the distal branches of the cerebral arteries on digital subtraction angiography and cerebral biopsy may be helpful (Hajj-Ali *et al.*, 2011). Cortical venous thrombosis may cause acute cSAH, but the frequency remains uncertain (Panda *et al.*, 2010; Field and Kleinig, 2011). Some studies report high-grade carotid stenosis as a cause of acute cSAH due to altered haemodynamics in dilated pial collateral vessels (Geraldles *et al.*, 2014), but it is possible that the association is coincidental and that the acute cSAH might have an alternative cause (e.g. CAA).

## Prevalence and associations of cortical superficial siderosis in healthy elderly populations

In 2009, the population-based Rotterdam Study of 1062 non-demented subjects  $\geq 60$  years, reported cSS in seven individuals (0.7% prevalence; Vernooij *et al.*, 2009), compared to a much higher prevalence of lobar microbleeds (nearly 14%; Vernooij *et al.*, 2008). Interestingly, all of these subjects with cSS also had lobar cerebral microbleeds, with at least one microbleed close to the area of cSS (Fig. 5). For the present review, the Rotterdam Study group updated this prevalence estimate for all 3401 study individuals aged  $\geq 60$  years (mean age 71.7, range: 60–98 years; 44.6% male) and found 15 cases (0.4%) of cSS. All subjects had concurrent microbleeds, the large majority (80%) lobar in location. Among 1425 individuals aged  $> 60$  years who had two brain scans  $\sim 3$  years apart (mean age 66.5, range: 60–96.8 years; 47.2% male), two developed new cSS (incidence 0.14%) (Fig. 5), one of whom also developed new lobar microbleeds. Of those who had cSS at baseline, four of seven showed progression at 3 years follow-up (Fig. 5). All of these subjects also had multiple lobar microbleeds at baseline, ranging in number from 7 to 130. These data, though originating from a single Caucasian population, suggest a link between lobar cerebral microbleeds and the prevalence, incidence and progression of cSS in non-demented populations, and support the hypothesis that in community-dwelling subjects, CAA is the prevailing underlying pathology of cSS.

## Clinical significance and mechanisms of cortical superficial siderosis in cerebral amyloid angiopathy

The two most common sporadic forms of cerebral small vessel disease are: (i) an arteriolar process often related to ageing and other common vascular risk factors (e.g. hypertension and diabetes), characterized pathologically by lipohyalinosis, arteriolosclerosis or fibrinoid necrosis, and

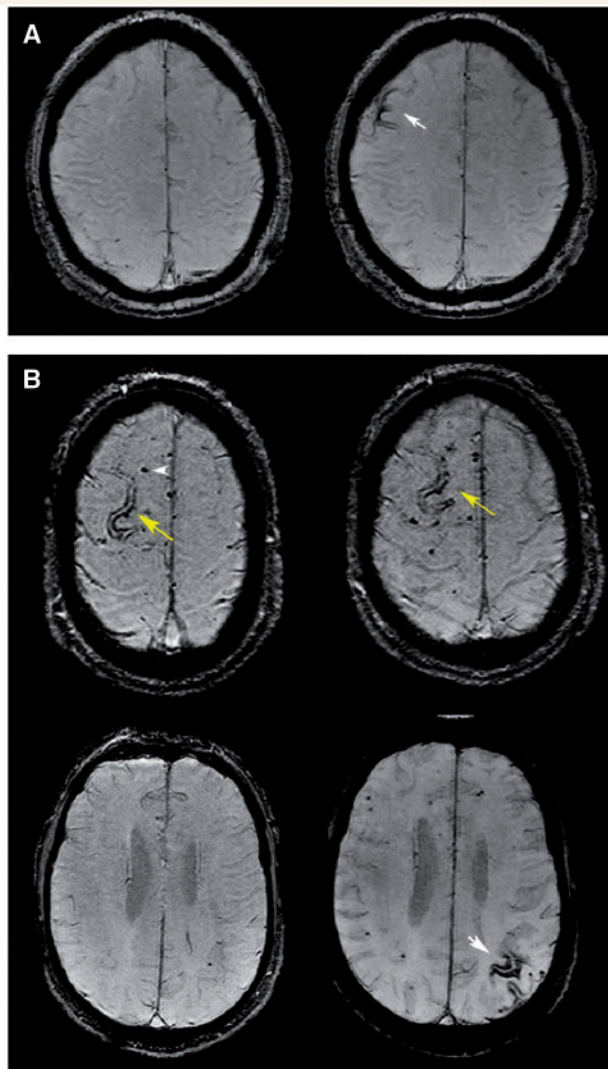

**Figure 5 Incident and progression of cSS in healthy elderly individuals.** (A) Baseline (left) and 3-year follow up (right) T<sub>2</sub>\*-GRE scans of the same participant, showing incident cSS (arrow) on the follow up scan. (B) Baseline (left) and 3-year follow-up (right) T<sub>2</sub>\*-GRE images of community dwelling subject showing right frontal lobe cSS on baseline not changing at follow up (yellow arrows) as well as new left parietal cSS at follow-up (white arrow). Note the presence of multiple microbleeds in close vicinity to the area cSS (B, white arrowhead).

typically affecting the small perforating end-arteries of the deep grey nuclei and deep white matter (often termed ‘hypertensive arteriopathy’); and (ii) sporadic CAA (Greenberg, 2006; Pantoni, 2010). CAA is characterized by progressive amyloid- $\beta$  accumulation within cortical and leptomeningeal vessel walls (Charidimou *et al.*, 2012a), causing both haemorrhagic and ischaemic brain injury (Smith *et al.*, 2008; Gregoire *et al.*, 2011; Charidimou *et al.*, 2012a; Peca *et al.*, 2013). CAA is associated with spontaneous symptomatic lobar ICH in older individuals, which have a high risk of recurrence

(Charidimou *et al.*, 2012a), and is an important contributor to cognitive impairment (Keage *et al.*, 2009; Arvanitakis *et al.*, 2011). CAA is also associated with characteristic MRI biomarkers including multiple lobar microbleeds (Greenberg *et al.*, 2009), white matter hyperintensities (leukoaraiosis) and more recently, cSS (Linn *et al.*, 2008, 2010), cerebral microinfarcts (Gregoire *et al.*, 2011; Smith *et al.*, 2012) and multiple enlarged perivascular spaces in the cerebral white matter (Martinez-Ramirez *et al.*, 2013; Charidimou *et al.*, 2014). cSS is hypothesized to be more characteristic of CAA than hypertensive arteriopathy because CAA preferentially affects the superficial cortical and leptomeningeal vessels.

### Cortical superficial siderosis as a neuroimaging biomarker of cerebral amyloid angiopathy

One study found cSS in 60.5% of patients with histopathologically-proven CAA ( $n = 38$ ; mean age  $70 \pm 6.4$  years) but in none of the controls with histopathologically-proven non-CAA-related ICH ( $n = 22$ ; mean age  $54 \pm 18$  years) (Linn *et al.*, 2010). Of note, the majority of patients with histopathologically-proven CAA in this study had a symptomatic ICH, thus likely representing a selected subset with pathologically advanced disease. A subsequent imaging study further investigated the strength of this association and found cSS in 40% of probable CAA patients, but <5% of patients with a ‘strictly deep’ pattern of ICH (Charidimou *et al.*, 2013b); cSS was also detected in 15% of patients with a single lobar ICH or mixed (lobar and deep) haemorrhages but in most of these cases lobar cerebral microbleeds were also present suggesting some degree of CAA pathology (Charidimou *et al.*, 2013b). In another longitudinal cohort of probable CAA cases ( $n = 84$ ), the prevalence of cSS was also high (48%) (Shoamanesh *et al.*, 2014). cSS has also been detected in Dutch-type amyloid angiopathy, a hereditary form of CAA, always in the direct vicinity of a lobar ICH or microbleed(s) (van Rooden *et al.*, 2009). Some of these studies are limited to retrospective convenience samples. There are no data on the prevalence of cSS in other types of hereditary cerebral small vessel disease (e.g. CADASIL, cerebral autosomal dominant arteriopathy with subcortical infarcts and leukoencephalopathy). Based on these observations, cSS has been suggested as a marker of rupture of CAA-laden cortical or leptomeningeal vessels, offering equal evidence to cerebral microbleeds or ICH for CAA presence. One study included cSS in modified Boston criteria for CAA diagnosis (Supplementary Table 1), and showed a potential improvement in sensitivity (Linn *et al.*, 2010), but further validation studies are needed to determine whether disseminated cSS increases the specificity for CAA. Currently, clinical-imaging diagnostic criteria for



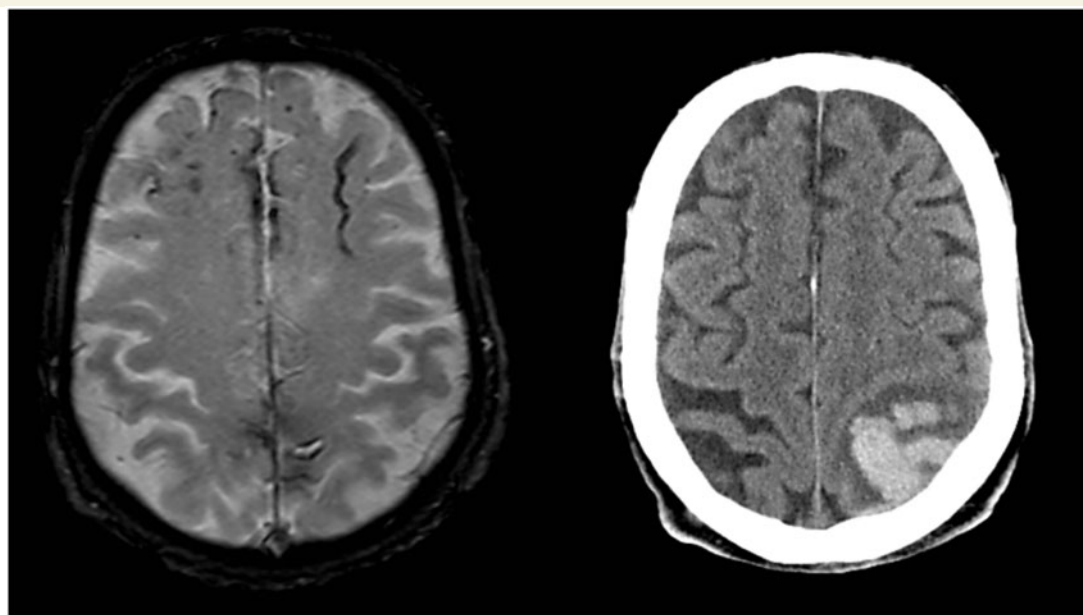

**Figure 6 cSS and subsequent ICH.** Axial T<sub>2</sub>\*-GRE MRI (left) showing disseminated cSS, with a subsequent spontaneous symptomatic left parietal ICH shown on an unenhanced CT (right) at follow-up 4 months later.

CAA can only indicate a high probability of the presence of disease in the absence of histopathological material.

### Cortical superficial siderosis and future ICH risk in cerebral amyloid angiopathy

Case reports and small case series (Katoh *et al.*, 2007; Kawahara *et al.*, 2010; Kumar *et al.*, 2010; Profice *et al.*, 2011) suggest that cSS in the context of symptomatic CAA may be a marker of vulnerability to bleeding (Fig. 6). A retrospective cohort on 51 CAA patients with cSS observed new intracranial haemorrhages in 24 patients (47.1%), new ICHs in 18 patients (35.3 %), and new acute cSAHs in six patients (11.7%), during a median follow-up time period of 35.3 months (Linn *et al.*, 2013). A European multicentre study of patients with probable or possible CAA ( $n = 118$ ), including those without cSS at baseline (Charidimou *et al.*, 2013c), found that over a median follow-up time of 24 months, 23 of 118 patients experienced symptomatic lobar ICH; cSS was a predictor of ICH risk. The ICH risk at 4 years was 25% (95% CI: 7.6–28.3%) for patients without siderosis, 28.9% (95% CI: 7.7–76.7%) for patients with focal siderosis and 74% (95% CI: 44.1–95.7) for patients with disseminated cSS (log-rank test:  $P = 0.0031$ ). These results remained consistent after adjusting for age, the presence of multiple ( $\geq 2$ ) lobar cerebral microbleeds (a haemorrhagic marker of CAA previously shown to influence the risk of ICH; Greenberg *et al.*, 2004), and

previous symptomatic ICH prior to the index qualifying inclusion event.

### Transient focal neurological episodes related to cortical superficial siderosis and acute convexity subarachnoid haemorrhage

Transient focal neurological episodes have long been known as a feature of CAA, often termed ‘amyloid spells’ (Greenberg *et al.*, 1993; Charidimou *et al.*, 2012b). CAA patients with transient focal neurological episodes are more likely to have cSS than those without (50% versus 19% in one study; Charidimou *et al.*, 2012c), which, given the association between cSS and ICH risk, has implications for future ICH risk in patients presenting with transient focal neurological episodes if they are misdiagnosed with transient ischaemic attack and exposed to antithrombotic therapy (Charidimou *et al.*, 2012b). Transient focal neurological episodes in CAA were found in 14% of patients with CAA in a recent study (Charidimou *et al.*, 2012c); they are typically recurrent, stereotyped, transient (typically lasting minutes to hours) episodes of paraesthesias, numbness or weakness of smoothly spreading onset over seconds to minutes, usually resolving over a similar period (Smith *et al.*, 1985; Greenberg *et al.*, 1993; Roch *et al.*, 2005; Brunot *et al.*, 2010; Finelli, 2010; Raposo *et al.*, 2011). CAA-related transient focal neurological episodes can resemble transient ischaemic attacks, migraine auras or seizures, although may not be quite typical of any of them



(Greenberg *et al.*, 1993; Charidimou *et al.*, 2012c). The typically spreading nature of symptom onset, their short duration, and stereotyped character suggest focal seizure activity (Baumann *et al.*, 2006; Hammen *et al.*, 2007; Cianchetti *et al.*, 2009), cortical spreading depression (Dreier *et al.*, 2000; Dreier, 2011) or local vasospasm (Dreier *et al.*, 2000; Feldman *et al.*, 2008), due to fresh blood or blood-breakdown products accumulating in superficial cortical layers of eloquent areas (such as the central sulcus).

Importantly, CAA-related transient focal neurological episodes were associated with an early risk of symptomatic lobar ICH [24.5% (95% CI: 15.8–36.9%) at 8 weeks in one recent multicentre study; Charidimou *et al.*, 2012c]; cSS might underpin this increased clinical risk, at least in some patients (Charidimou *et al.*, 2013c). It is currently difficult to estimate how often in clinical practice transient neurological symptoms are due to CAA and cSS or cSAH rather than typical transient ischaemic attacks. As few centres routinely acquire blood-sensitive MRI sequences, CAA-related transient focal neurological episodes are likely to be under-recognized.

We therefore suggest that MRI, including not only DWI but also blood-sensitive sequences, is essential in the investigation of older patients with unexplained transient focal neurological episodes, especially if they are atypical for transient ischaemic attack (i.e., recurrent and stereotyped or without known risk factors) (Charidimou *et al.*, 2013a). The identification of cSS or acute cSAH as potential mechanisms of transient focal neurological episodes may lead to a diagnosis of previously unsuspected CAA, which should mandate aggressive treatment of known risk factors for recurrent ICH (including hypertension and avoiding antithrombotic exposure). Case series suggest that anticonvulsant or migraine preventive medications may be helpful for symptomatic treatment of transient focal neurological episodes (Finelli, 2010; Paterson *et al.*, 2013), though attacks may also cease spontaneously (Charidimou *et al.*, 2012c).

## Possible pathophysiological mechanisms of cortical superficial siderosis in cerebral amyloid angiopathy

There are several mechanisms by which CAA might cause cSS: (i) a ‘primary’ mechanism, unrelated to large parenchymal ICH, due to (repeated) episodes of acute cSAH from brittle and fragile leptomeningeal or superficial cortical CAA-affected vessels; (ii) a ‘secondary’ mechanism due to leakage or expansion of a lobar ICH (or superficial lobar microbleeds) into the subarachnoid space; or (iii) haemorrhagic transformation of small cortical infarcts.

Acute cSAH precedes cSS in patients with CAA *in vivo* (Linn *et al.*, 2010), a mechanism supported by subpial cortical haemosiderin deposition following experimental models of subarachnoid bleeding (Koeppen *et al.*, 1993). Moreover, recent clinical studies noted cSS mostly distant

from ICH (often in the opposite hemisphere), and even in the absence of any ICH (Linn *et al.*, 2010; Charidimou *et al.*, 2013b). In one study, 20% of CAA patients with cSS also had evidence of acute cSAH, also consistent with recurrent bleeding into the subarachnoid space (Charidimou *et al.*, 2013b).

Lobar ICH causing ‘secondary’ cSS is supported by associations between previous lobar ICH and cSS in CAA cohorts (Charidimou *et al.*, 2013b), as well as CT and direct post-mortem evidence of rupturing from the superficial surface of lobar ICH into the subarachnoid space, or into the ventricles (Itoh *et al.*, 1993; Itoh and Yamada, 1997; Zhan *et al.*, 2004; Maas *et al.*, 2013). A neuropathological series of six autopsy cases of CAA also suggests a link between cSAH and ICH: multiple leptomeningeal arteries can rupture to cause connected haematomas in both the subarachnoid space and the brain parenchyma (Takeda *et al.*, 2003, 2012). These observations might help explain the association between cSS and future ICH risk (Charidimou *et al.*, 2013c); cSS (particularly disseminated) may reflect numerous and widespread leptomeningeal blood vessels damaged by advanced CAA, providing multiple potential initiation sites for future ICH (Takeda *et al.*, 2003, 2012).

How cerebral microbleeds relate to cSS remains uncertain. Cerebral microbleeds were almost invariably associated with cSS in the Rotterdam scan study, suggesting a common underlying mechanism (see ‘Prevalence and associations of cSS in healthy elderly populations’ section). By contrast, a recent study in CAA reported that cSS was not associated with lobar microbleed burden (Charidimou *et al.*, 2013b), raising the possibility that cSS and cerebral microbleeds may result from different mechanisms. In support of this idea, a recent observational cohort of patients with symptomatic and likely advanced CAA found that cSS occurred in patients with lower microbleed counts and with the APOE ε2 allele (Shoamanesh *et al.*, 2014). The hypothesis that cSS and cerebral microbleeds might have partially distinct vasculopathic mechanisms, at least in CAA, requires validation in larger external cohorts.

A 7 T post-mortem MRI study including elderly subjects with various neurodegenerative and cerebrovascular pathologies, suggested that cSS could result from haemorrhagic transformation of cortical microinfarcts (De Reuck *et al.*, 2013) although microinfarcts could also appear close to cSS (Join-Lambert *et al.*, 2013) due to focally active severe microangiopathy.

## Prevalence and clinical significance of cortical superficial siderosis in a memory clinic setting including individuals with Alzheimer’s disease

Two recent imaging studies evaluated cSS in a memory clinic setting (Wollenweber *et al.*, 2014; Zonneveld *et al.*, 2014). Patients with mild cognitive impairment (MCI) or

dementia had prevalence rates of cSS between 2.1% (in MCI) and 7.1% (any dementia according to ICD-10) (Wollenweber *et al.*, 2014; Zonneveld *et al.*, 2014). Patients fulfilling the criteria for Alzheimer's disease showed a prevalence of 4.8%. cSS was associated with lower MMSE score, APOE ε4 genotype, higher number of cerebral microbleeds, and white matter hyperintensities burden. The majority of cSS-affected patients did not have a history of ICH. Moreover, not all patients with cSS had cerebral microbleeds [~6% of cases with cSS had no cerebral microbleeds in one study (Zonneveld *et al.*, 2014); 54% in another study (Wollenweber *et al.*, 2014)], so cSS might be the only diagnostic clue to CAA in these patients. In another recent study from a memory clinic population, cSS was also associated with markers of CAA, including higher cortical PET-based Pittsburgh compound B (PiB) retention and APOE ε2 presence (Na *et al.*, 2015). The available data thus support the hypothesis that cSS might be a manifestation of advanced CAA in memory clinic cohorts, but the exact relationships between cSS, CAA and Alzheimer's disease require further study.

## Cortical superficial siderosis and relevance for treatments

### Antithrombotic drugs

Currently, there are no evidence-based data outside observational studies to guide antithrombotic treatment decision in patients with CAA and cSS. However, the risk of ICH recurrence in patients with a history of previous CAA-related ICH who are not on antithrombotic therapies is high: ~10% per year (Biffi *et al.*, 2010), which is further increased with antithrombotic drugs (Biffi *et al.*, 2010) or the presence of cSS (Charidimou *et al.*, 2013c). In patients with cSS and other neuroimaging or clinical manifestations indicative of CAA (e.g. multiple lobar microbleeds and lobar ICH), we suggest that the risks and benefits of administering antithrombotic drugs (including antiplatelets) should be carefully balanced, especially when a strong indication for antithrombotic treatment that might outweigh the risk of ICH exists (for example unstable ischaemic heart disease or non-valvular atrial fibrillation). A well-designed randomized controlled trial might ultimately resolve these important clinical questions, but will be challenging to perform. Future studies should explore if cSS is a clinically important feature for haemorrhagic risk assessment in older patients without symptoms, in the context of anticoagulants, including recently approved newer direct oral anticoagulants (dabigatran, rivaroxaban, apixaban, edoxaban) (Connolly *et al.*, 2009; Granger *et al.*, 2011; Patel *et al.*, 2011; Giugliano *et al.*, 2013). Careful control of blood pressure in CAA-associated cSS is reasonable in this situation, as it is likely to provide protection against CAA-related cerebral haemorrhage (Arima *et al.*, 2010).

## Cortical superficial siderosis in clinical trials: immunization therapy in Alzheimer's disease and cerebral amyloid angiopathy

cSS could have implications for disease-modifying immunotherapy treatments in Alzheimer's disease for which there are concerns regarding inflammatory and haemorrhagic complications attributed to rapid amyloid-β shifts from brain parenchyma to the perivascular spaces of small vessels (Salloway *et al.*, 2009; Sperling *et al.*, 2011, 2012; Ostrowitzki *et al.*, 2012). These complications have been collectively referred to as amyloid-related imaging abnormalities (ARIA). Subtypes of ARIA include MRI signal abnormalities suggestive of vasogenic oedema and sulcal effusions (ARIA-E) and cerebral microbleeds and hemosiderin deposits in the form of cSS (ARIA-H) (Sperling *et al.*, 2011). In a consensus paper from the US Alzheimer's Association, cerebral microbleeds (>4) have been considered a possible caution for such treatments (Sperling *et al.*, 2011), but the role of cSS should also be explored as a risk factor for ARIA. With increasing knowledge of CAA pathophysiology, disease-modification by modulating amyloid-β production or elimination may be a realistic option in future; cSS should be investigated as a potential marker for ICH or ARIA risk in future immunotherapy trials in CAA.

## Conclusion, critical appraisal of current evidence, and future directions

Accumulating evidence suggests that cSS is a central component of haemorrhagic small vessel associated pathology in various populations, including healthy elderly cohorts, memory clinics and in CAA. cSS is of particular interest in expanding the clinical-imaging spectrum of CAA (Greenberg *et al.*, 1993; Maia *et al.*, 2007; Charidimou, 2015; Mehndiratta and Mendel, 2015), with the potential to identify new mechanisms and subtypes of the disease. cSS and acute cSAH may have clinical relevance for: future haemorrhage risk and the effect of antithrombotic drugs; relationship to other manifestations of small-vessel disease; and for cognitive impairment and neurological dysfunction (including transient focal neurological episodes).

It is, however, important to highlight the methodological limitations and potential biases of currently available studies. First, the strength of the association between cSS and CAA and the clinical significance may differ depending on the cohort under study. The different study populations include: (i) symptomatic and likely advanced CAA mainly presenting with lobar ICH and fulfilling the Boston criteria; (ii) memory clinic cohorts where the severity and clinical impact of CAA needs to be further defined; and (iii) healthy elderly individuals, in whom CAA may be asymptomatic but suspected on the basis of associated imaging and

### Box 1 Recommended criteria for identification of cortical superficial siderosis and acute convexity subarachnoid haemorrhage (acute cSAH) in the context of CAA

- Well-defined, homogeneous hypointense curvilinear signal intensity (black) on T<sub>2</sub>\*-GRE or SWI MRI in the superficial layers of the cerebral cortex, within the subarachnoid space, or both
- Blooming effect on T<sub>2</sub>\*-GRE and SWI compared to T<sub>1</sub>- or T<sub>2</sub>-weighted sequences
- If there is corresponding signal hyperintensity in the subarachnoid space on proton density-weighted or FLAIR sequences (or hyperdense on CT if available) we recommend the term 'acute cSAH'
- Axial T<sub>1</sub>-weighted or FLAIR images should be used for anatomical confirmation of the gyral location of the signal hypointensities identified on T<sub>2</sub>\*-GRE or SWI sequences
- Absence of infratentorial (brainstem, cerebellum, spinal cord) siderosis
- Ensure exclusion of potential haemorrhagic and non-haemorrhagic mimics (e.g. vessels flow voids, thrombosed vessels, petechial haemorrhagic transformation of infarcts, calcium deposits)
- Consider all potential non-CAA secondary aetiologies of cSS and acute cSAH

### Box 2 Advised standards for evaluating cortical superficial siderosis (cSS) in research studies of small vessel disease and cerebral amyloid angiopathy

- cSS and acute cSAH should be clearly defined according to the criteria in Box 1
- cSS should be categorized as focal or disseminated (e.g. in line with the modified Boston criteria)
- In each patient the location (cerebral lobes etc.) of cSS and number of cerebral sulci affected should be recorded
- cSS and acute cSAH should be evaluated separately as they convey information on the chronicity of bleeding events
- cSS or acute cSAH clearly connected with any lobar intracerebral haemorrhage should be rated separately as they may not provide clear evidence of individual bleeding events distinct from the ICH
- Other relevant vascular neuroimaging lesions both remote from and in close proximity (e.g. up to 1 cm) to cSS (e.g. cerebral microbleeds, acute small DWI lesions, perivascular spaces) should be evaluated using established standards [e.g. those described in the Standards for Reporting Vascular changes on nEuroimaging (STRIVE) initiative]

genetic findings. The Boston diagnostic criteria have high specificity and relatively good sensitivity in ICH populations (Knudsen *et al.*, 2001), but have not been validated in community samples. Even in ICH populations, the specificity of the 'probable' category may not be 100%, so that some individuals without CAA may have been misclassified. Robust large-scale unselected prospective data on cSS in all populations of interest remain scarce; studies to date have been mainly performed by a small number of research groups including potentially biased convenience samples. For example, the evidence for an independent link between cSS and future ICH risk comes from one multicentre hospital-based cohort. Defining the true clinical relevance of cSS requires replication of currently available data in larger systematic unbiased prospective studies in relevant hospital and community populations; key areas for future research are shown in Supplementary Table 2. The ongoing SuSPect-CAA trial (Superficial Siderosis in Patients with suspected Cerebral Amyloid Angiopathy; clinical trials identifier: NCT01856699) is a multicentre study, which aims to prospectively evaluate acute cSAHs and cSS as independent predictors for future stroke and mortality in

patients with possible or probable CAA, as well as to better define their clinical presentation and outcome. Data from the SuSPect-CAA study may help further define the role of cSS as a neuroimaging biomarker in future CAA treatment trials (Greenberg *et al.*, 2014). Further promising areas of research include correlations of cSS with non-invasive amyloid- $\beta$  molecular imaging with PET agents such as PiB to determine its relationship to amyloid deposition (Gurol *et al.*, 2012, 2013; Baron *et al.*, 2014), assessment of associations with APOE genotype (Rannikmae *et al.*, 2014; Charidimou *et al.*, 2015; Mehndiratta and Mendel, 2015), and systematic radiological-pathological correlation studies. We suggest in the meantime that clear standards for cSS definition, detection and evaluation will help facilitate cross-study comparisons and pooling of data in future collaborative research efforts (Boxes 1 and 2).

## Funding

Dr A Charidimou received research support from the Greek State Scholarship Foundation, the Stroke Association and



the British Heart Foundation. Dr RJ Jäger has received research support from the Samantha Dickson Brain Tumour Trust and the Brain Research Trust. Dr Werring receives research support from the Stroke Association and the British Heart Foundation. This work was partly undertaken at UCLH/UCL who received a proportion of funding from the Department of Health's NIHR Biomedical Research Centres funding scheme.

## Supplementary material

Supplementary material is available at *Brain* online.

## References

- Arima H, Tzourio C, Anderson C, Woodward M, Bousser MG, MacMahon S, et al. Effects of perindopril-based lowering of blood pressure on intracerebral hemorrhage related to amyloid angiopathy: the PROGRESS trial. *Stroke* 2010; 41: 394–6.
- Arvanitakis Z, Leurgans SE, Wang Z, Wilson RS, Bennett DA, Schneider JA. Cerebral amyloid angiopathy pathology and cognitive domains in older persons. *Ann Neurol* 2011; 69: 320–7.
- Atlas SW, Mark AS, Grossman RI, Gomori JM. Intracranial hemorrhage: gradient-echo MR imaging at 1.5 T. Comparison with spin-echo imaging and clinical applications. *Radiology* 1988; 168: 803–7.
- Baron JC, Farid K, Dolan E, Turc G, Marrapu ST, O'Brien E, et al. Diagnostic utility of amyloid PET in cerebral amyloid angiopathy-related symptomatic intracerebral hemorrhage. *J Cereb Blood flow Metab* 2014; 34: 753–8.
- Baumann CR, Schuknecht B, Lo Russo G, Cossu M, Citterio A, Andermann F, et al. Seizure outcome after resection of cavernous malformations is better when surrounding hemosiderin-stained brain also is removed. *Epilepsia* 2006; 47: 563–6.
- Beitzke M, Gattringer T, Enzinger C, Wagner G, Niederkorn K, Fazekas F. Clinical presentation, etiology, and long-term prognosis in patients with nontraumatic convexal subarachnoid hemorrhage. *Stroke* 2011; 42: 3055–60.
- Biffi A, Halpin A, Towfighi A, Gilson A, Busl K, Rost N, et al. Aspirin and recurrent intracerebral hemorrhage in cerebral amyloid angiopathy. *Neurology* 2010; 75: 693–8.
- Brunot S, Osseby GV, Rouaud O, Kazemi A, Ricolfi F, Couvreur G, et al. Transient ischaemic attack mimics revealing focal subarachnoid haemorrhage. *Cerebrovasc Dis* 2010; 30: 597–601.
- Charidimou A, Baron JC, Werring DJ. Transient focal neurological episodes, cerebral amyloid angiopathy, and intracerebral hemorrhage risk: looking beyond TIAs. *Int J Stroke* 2013a; 8: 105–8.
- Charidimou A, Gang Q, Werring DJ. Sporadic cerebral amyloid angiopathy revisited: recent insights into pathophysiology and clinical spectrum. *J Neurol Neurosurg Psychiatry* 2012a; 83: 124–37.
- Charidimou A, Jager RH, Fox Z, Peeters A, Vandermeeren Y, Laloux P, et al. Prevalence and mechanisms of cortical superficial siderosis in cerebral amyloid angiopathy. *Neurology* 2013b; 81: 626–32.
- Charidimou A, Jaunmuktane Z, Baron JC, Burnell M, Varlet P, Peeters A, et al. White matter perivascular spaces: An MRI marker in pathology-proven cerebral amyloid angiopathy? *Neurology* 2014; 82: 57–62.
- Charidimou A, Law R, Werring DJ. Amyloid “spells” trouble. *Lancet* 2012b; 380: 1620.
- Charidimou A, Martinez-Ramirez S, Shoamanesh A, Oliveira-Filho J, Frosch M, Vashkevich A, et al. Cerebral amyloid angiopathy with and without hemorrhage: Evidence for different disease phenotypes. *Neurology* 2015; 84: 1206–12.
- Charidimou A, Peeters A, Fox Z, Gregoire SM, Vandermeeren Y, Laloux P, et al. Spectrum of transient focal neurological episodes in cerebral amyloid angiopathy: multicentre magnetic resonance imaging cohort study and meta-analysis. *Stroke* 2012c; 43: 2324–30.
- Charidimou A, Peeters AP, Jager R, Fox Z, Vandermeeren Y, Laloux P, et al. Cortical superficial siderosis and intracerebral hemorrhage risk in cerebral amyloid angiopathy. *Neurology* 2013c; 81: 1666–73.
- Cheng AL, Batool S, McCreary CR, Lauzon ML, Frayne R, Goyal M, et al. Susceptibility-weighted imaging is more reliable than T2\*-weighted gradient-recalled echo MRI for detecting microbleeds. *Stroke* 2013; 44: 2782–6.
- Cianchetti FA, Nishimura N, Schaffer CB. Cortical microhaemorrhages reduce stimulus-evoked calcium responses in nearby neurons. *J Cereb Blood Flow Metab* 2009; 29: S217–S8.
- Connolly SJ, Ezekowitz MD, Yusuf S, Eikelboom J, Oldgren J, Parekh A, et al. Dabigatran versus warfarin in patients with atrial fibrillation. *N Engl J Med* 2009; 361: 1139–51.
- Cuvincui V, Viguier A, Calviere L, Raposo N, Larrue V, Cognard C, et al. Isolated acute nontraumatic cortical subarachnoid hemorrhage. *Am J Neuroradiol* 2010; 31: 1355–62.
- De Reuck J, Deramecourt V, Cordonnier C, Auger F, Durieux N, Pasquier F, et al. Superficial siderosis of the central nervous system: a post-mortem 7.0-tesla magnetic resonance imaging study with neuropathological correlates. *Cerebrovasc Dis* 2013; 36: 412–7.
- Dreier JP. The role of spreading depression, spreading depolarization and spreading ischemia in neurological disease. *Nat Med* 2011; 17: 439–47.
- Dreier JP, Ebert N, Priller J, Megow D, Lindauer U, Klee R, et al. Products of hemolysis in the subarachnoid space inducing spreading ischemia in the cortex and focal necrosis in rats: a model for delayed ischemic neurological deficits after subarachnoid hemorrhage? *J Neurosurg* 2000; 93: 658–66.
- Ducros A. Reversible cerebral vasoconstriction syndrome. *Lancet Neurol* 2012; 11: 906–17.
- Ducros A, Boukobza M, Porcher R, Sarov M, Valade D, Boussier MG. The clinical and radiological spectrum of reversible cerebral vasoconstriction syndrome. A prospective series of 67 patients. *Brain* 2007; 130(Pt 12): 3091–101.
- Ducros A, Fiedler U, Porcher R, Boukobza M, Stapf C, Boussier MG. Hemorrhagic manifestations of reversible cerebral vasoconstriction syndrome: frequency, features, and risk factors. *Stroke* 2010; 41: 2505–11.
- Fearnley JM, Stevens JM, Rudge P. Superficial siderosis of the central nervous system. *Brain* 1995; 118 (Pt 4): 1051–66.
- Feldman HH, Maia LF, Mackenzie IR, Forster BB, Martzke J, Woolfenden A. Superficial siderosis: a potential diagnostic marker of cerebral amyloid angiopathy in Alzheimer disease. *Stroke* 2008; 39: 2894–7.
- Field DK, Kleinig TJ. Aura attacks from acute convexity subarachnoid haemorrhage not due to cerebral amyloid angiopathy. *Cephalalgia* 2011; 31: 368–71.
- Finelli PF. Cerebral amyloid angiopathy as cause of convexity SAH in elderly. *Neurologist* 2010; 16: 37–40.
- Geraldes R, Sousa PR, Fonseca AC, Falcao F, Canhao P, Pinho e Melo T. Nontraumatic convexity subarachnoid hemorrhage: different etiologies and outcomes. *J Stroke Cerebrovasc Dis* 2014; 23: e23–30.
- Giugliano RP, Ruff CT, Braunwald E, Murphy SA, Wiviott SD, Halperin JL, et al. Edoxaban versus warfarin in patients with atrial fibrillation. *N Engl J Med* 2013; 369: 2093–104.
- Goos JD, van der Flier WM, Knol DL, Pouwels PJ, Scheltens P, Barkhof F, et al. Clinical relevance of improved microbleed detection by susceptibility-weighted magnetic resonance imaging. *Stroke* 2011; 42: 1894–900.
- Goulencok T, Klein I, Mazighi M, Messika-Zeitoun D, Alexandra JF, Mourvillier B, et al. Infective endocarditis with symptomatic cerebral

- complications: contribution of cerebral magnetic resonance imaging. *Cerebrovasc Dis* 2013; 35: 327–36.
- Granger CB, Alexander JH, McMurray JJ, Lopes RD, Hylek EM, Hanna M, et al. Apixaban versus warfarin in patients with atrial fibrillation. *New Engl J Med* 2011; 365: 981–92.
- Greenberg SM. Small vessels, big problems. *N Engl J Med* 2006; 354: 1451–3.
- Greenberg SM, Eng JA, Ning M, Smith EE, Rosand J. Hemorrhage burden predicts recurrent intracerebral hemorrhage after lobar hemorrhage. *Stroke* 2004; 35: 1415–20.
- Greenberg SM, Finklestein SP, Schaefer PW. Petechial hemorrhages accompanying lobar hemorrhage: detection by gradient-echo MRI. *Neurology* 1996; 46: 1751–4.
- Greenberg SM, Salman RA, Biessels GJ, van Buchem M, Cordonnier C, Lee JM, et al. Outcome markers for clinical trials in cerebral amyloid angiopathy. *Lancet Neurol* 2014; 13: 419–28.
- Greenberg SM, Vernooij MW, Cordonnier C, Viswanathan A, Al-Shahi Salman R, Warach S, et al. Cerebral microbleeds: a guide to detection and interpretation. *Lancet Neurol* 2009; 8: 165–74.
- Greenberg SM, Vonsattel JP, Stakes JW, Gruber M, Finklestein SP. The clinical spectrum of cerebral amyloid angiopathy: presentations without lobar hemorrhage. *Neurology* 1993; 43: 2073–9.
- Gregoire SM, Charidimou A, Gadapa N, Dolan E, Antoun N, Peeters A, et al. Acute ischaemic brain lesions in intracerebral haemorrhage: multicentre cross-sectional magnetic resonance imaging study. *Brain* 2011; 134(Pt 8): 2376–86.
- Gregoire SM, Werring DJ, Chaudhary UJ, Thornton JS, Brown MM, Yousry TA, et al. Choice of echo time on GRE T2\*-weighted MRI influences the classification of brain microbleeds. *Clin Radiol* 2010; 65: 391–4.
- Gurrol ME, Dierksen G, Betensky R, Gidicsin C, Halpin A, Becker A, et al. Predicting sites of new hemorrhage with amyloid imaging in cerebral amyloid angiopathy. *Neurology* 2012; 79: 320–6.
- Gurrol ME, Viswanathan A, Gidicsin C, Hedden T, Martinez-Ramirez S, Dumas A, et al. Cerebral amyloid angiopathy burden associated with leukoaraiosis: A positron emission tomography/magnetic resonance imaging study. *Ann Neurol* 2013; 73: 529–36.
- Haacke EM, Boikov AS, Barnes E, Neelavalli J, Khan MA. Susceptibility-weighted imaging. In: Werring DJ, editor. *Cerebral microbleeds: pathophysiology to clinical practice*. Cambridge University Press; 2011. p. 22–33.
- Haacke EM, Mittal S, Wu Z, Neelavalli J, Cheng YC. Susceptibility-weighted imaging: technical aspects and clinical applications, part 1. *Am J Neuroradiol* 2009; 30: 19–30.
- Haacke EM, Xu Y, Cheng YC, Reichenbach JR. Susceptibility weighted imaging (SWI). *Magn Reson Med* 2004; 52: 612–8.
- Hajj-Ali RA, Singhal AB, Benseler S, Molloy E, Calabrese LH. Primary angiitis of the CNS. *Lancet Neurol* 2011; 10: 561–72.
- Hamill R. Report of a case of melanosis of the brain, cord and meninges. *J Nerv Ment Dis* 1908:594.
- Hammen T, Romstock J, Dorfler A, Kerling F, Buchfelder M, Stefan H. Prediction of postoperative outcome with special respect to removal of hemosiderin fringe: a study in patients with cavernous haemangiomas associated with symptomatic epilepsy. *Seizure* 2007; 16: 248–53.
- Itoh Y, Yamada M. Cerebral amyloid angiopathy in the elderly: the clinicopathological features, pathogenesis, and risk factors. *J Med Dental Sci* 1997; 44: 11–9.
- Itoh Y, Yamada M, Hayakawa M, Otomo E, Miyatake T. Cerebral amyloid angiopathy: a significant cause of cerebellar as well as lobar cerebral hemorrhage in the elderly. *J Neurol Sci* 1993; 116: 135–41.
- Join-Lambert C, Hodel J, Tamazyran R, Gerber S, Bruander M, Zuber M. Are silent ischemic infarcts in cerebral amyloid angiopathy associated with subarachnoid hemorrhage? *Cerebrovas Dis* 2013; 35(Suppl. 3):409.
- Katoh M, Yoshino M, Asaoka K, Aoki T, Imamura H, Kashiwazaki D, et al. A restricted subarachnoid hemorrhage in the cortical sulcus in cerebral amyloid angiopathy: could it be a warning sign? *Surg Neurol* 2007; 68: 457–60.
- Kawahara I, Nakamoto M, Matsuo Y, Tokunaga Y. A case of cerebral amyloid angiopathy in which a restricted subarachnoid hemorrhage recurred in the cortical sulcus following a subcortical hemorrhage [in Japanese]. *No Shinkei Geka* 2010; 38: 551–5.
- Keage HA, Carare RO, Friedland RP, Ince PG, Love S, Nicoll JA, et al. Population studies of sporadic cerebral amyloid angiopathy and dementia: a systematic review. *BMC Neurol* 2009; 9: 3.
- Khurram A, Kleinig T, Leyden J. Clinical associations and causes of convexity subarachnoid hemorrhage. *Stroke* 2014; 45: 1151–3.
- Knudsen KA, Rosand J, Karluk D, Greenberg SM. Clinical diagnosis of cerebral amyloid angiopathy: validation of the Boston criteria. *Neurology* 2001; 56: 537–9.
- Koeppen AH, Barron KD. Superficial siderosis of the central nervous system. A histological, histochemical and chemical study. *J Neuropathol Exp Neurol* 1971; 30: 448–69.
- Koeppen AH, Dickson AC, Chu RC, Thach RE. The pathogenesis of superficial siderosis of the central nervous system. *Ann Neurol* 1993; 34: 646–53.
- Koeppen AH, Michael SC, Li D, Chen Z, Cusack MJ, Gibson WM, et al. The pathology of superficial siderosis of the central nervous system. *Acta Neuropathol* 2008; 116: 371–82.
- Kumar N, Cohen-Gadol AA, Wright RA, Miller GM, Piepgras DG, Ahlskog JE. Superficial siderosis. *Neurology* 2006; 66: 1144–52.
- Kumar S, Goddeau RP, Selim MH, Thomas A, Schlaug G, Alhazzani A, et al. A traumatic convex subarachnoid hemorrhage: clinical presentation, imaging patterns, and etiologies. *Neurology* 2010; 74: 893–9.
- Linn J, Halpin A, Demaerel P, Ruhland J, Giese AD, Dichgans M, et al. Prevalence of superficial siderosis in patients with cerebral amyloid angiopathy. *Neurology* 2010; 74: 1346–50.
- Linn J, Herms J, Dichgans M, Bruckmann H, Fesl G, Freilinger T, et al. Subarachnoid hemosiderosis and superficial cortical hemosiderosis in cerebral amyloid angiopathy. *Am J Neuroradiol* 2008; 29: 184–6.
- Linn J, Michl S, Katja B, Pfefferkorn T, Wiesmann M, Hartz S, et al. Cortical vein thrombosis: the diagnostic value of different imaging modalities. *Neuroradiology* 2010; 52: 899–911.
- Linn J, Wollenweber FA, Lummel N, Bochmann K, Pfefferkorn T, Gschwendtner A, et al. Superficial siderosis is a warning sign for future intracranial hemorrhage. *J Neurol* 2013; 260: 176–81.
- Maas MB, Nemeth AJ, Rosenberg NF, Kosteva AR, Guth JC, Liotta EM, et al. Subarachnoid extension of primary intracerebral hemorrhage is associated with poor outcomes. *Stroke* 2013; 44: 653–7.
- Maia LF, Mackenzie IR, Feldman HH. Clinical phenotypes of cerebral amyloid angiopathy. *J Neurol Sci* 2007; 257: 23–30.
- Martinez-Ramirez S, Pontes-Neto OM, Dumas AP, Auriel E, Halpin A, Quimby M, et al. Topography of dilated perivascular spaces in subjects from a memory clinic cohort. *Neurology* 2013; 80: 1551–6.
- Mas J, Bouly S, Mourand I, Renard D, de Champfleury N, Labauge P. Focal convex subarachnoid hemorrhage: clinical presentation, imaging patterns and etiologic findings in 23 patients [in French]. *Rev Neurol (Paris)* 2013; 169: 59–66.
- Mehndiratta P, Mendel TA. Cortical superficial siderosis, APOE genotype, and hemorrhage risk in cerebral amyloid angiopathy. *Neurology* 2015; 84: 1190–1.
- Mittal S, Wu Z, Neelavalli J, Haacke EM. Susceptibility-weighted imaging: technical aspects and clinical applications, part 2. *AJNR Am J Neuroradiol* 2009; 30: 232–52.
- Na HK, Park JH, Kim JH, Kim HJ, Kim ST, Werring DJ, et al. Cortical superficial siderosis: A marker of vascular amyloid in patients with cognitive impairment. *Neurology* 2015; 84: 849–55.
- Nandigam RN, Viswanathan A, Delgado P, Skehan ME, Smith EE, Rosand J, et al. MR imaging detection of cerebral microbleeds: effect of susceptibility-weighted imaging, section thickness, and field strength. *Am J Neuroradiol* 2009; 30: 338–43.

- Oehmichen M, Raff G. Timing of cortical contusion. Correlation between histomorphologic alterations and post-traumatic interval. *Zeitschrift für Rechtsmedizin* 1980; 84: 79–94.
- Ostrowitzki S, Deptula D, Thurffjell L, Barkhof F, Bohrmann B, Brooks DJ, et al. Mechanism of amyloid removal in patients with Alzheimer disease treated with gantenerumab. *Arch Neurol* 2012; 69: 198–207.
- Panda S, Prashantha DK, Shankar SR, Nagaraja D. Localized convexity subarachnoid haemorrhage—a sign of early cerebral venous sinus thrombosis. *Eur J Neurol* 2010; 17: 1249–58.
- Pantoni L. Cerebral small vessel disease: from pathogenesis and clinical characteristics to therapeutic challenges. *Lancet Neurol* 2010; 9: 689–701.
- Patel MR, Mahaffey KW, Garg J, Pan G, Singer DE, Hacke W, et al. Rivaroxaban versus warfarin in nonvalvular atrial fibrillation. *New Engl J Med* 2011; 365: 883–91.
- Paterson RW, Uchino K, Emsley HC, Pullicino P. Recurrent stereotyped episodes in cerebral amyloid angiopathy: response to migraine prophylaxis in two patients. *Cerebrovasc Dis Extra* 2013; 3: 81–4.
- Peca S, McCreary CR, Donaldson E, Kumarpillai G, Shobha N, Sanchez K, et al. Neurovascular decoupling is associated with severity of cerebral amyloid angiopathy. *Neurology* 2013; 81: 1659–65.
- Profice P, Pilato F, Della GM, Colosimo C, Gaudino S, Arena V, et al. Recurrent subarachnoid bleeding and superficial siderosis in a patient with histopathologically proven cerebral amyloid angiopathy. *Case Rep Neurol* 2011; 3: 124–8.
- Rannikmae K, Kalaria RN, Greenberg SM, Chui HC, Schmitt FA, Samarasekera N, et al. APOE associations with severe CAA-associated vasculopathic changes: collaborative meta-analysis. *J Neurol Neurosurg Psychiatry* 2014; 85: 300–5.
- Raposo N, Viguier A, Cuvinciu V, Calviere L, Cognard C, Bonneville F, et al. Cortical subarachnoid haemorrhage in the elderly: a recurrent event probably related to cerebral amyloid angiopathy. *Eur J Neurol* 2011; 18: 597–603.
- Reichenbach JR, Venkatesan R, Schillinger DJ, Kido DK, Haacke EM. Small vessels in the human brain: MR venography with deoxyhemoglobin as an intrinsic contrast agent. *Radiology* 1997; 204: 272–7.
- Roch JA, Nighoghossian N, Hermier M, Cakmak S, Picot M, Honnorat J, et al. Transient neurologic symptoms related to cerebral amyloid angiopathy: usefulness of T2\*-weighted imaging. *Cerebrovasc Dis* 2005; 20: 412–4.
- Salloway S, Sperling R, Gilman S, Fox NC, Blennow K, Raskind M, et al. A phase 2 multiple ascending dose trial of bapineuzumab in mild to moderate Alzheimer disease. *Neurology* 2009; 73: 2061–70.
- Shams S, Martola J, Cavallin L, Granberg T, Shams M, Aspelin P, et al. SWI or T2\*: Which MRI sequence to use in the detection of cerebral microbleeds? The karolinska imaging dementia study. *AJNR Am J Neuroradiol* 2015.
- Shoamanesh A, Martinez-Ramirez S, Oliveira-Filho J, Reijmer Y, Falcone GJ, Ayres A, et al. Interrelationship of superficial siderosis and microbleeds in cerebral amyloid angiopathy. *Neurology* 2014; 83: 1838–43.
- Smith DB, Hitchcock M, Philpott PJ. Cerebral amyloid angiopathy presenting as transient ischemic attacks. Case report. *J Neurosurg* 1985; 63: 963–4.
- Smith EE, Schneider JA, Wardlaw JM, Greenberg SM. Cerebral microinfarcts: the invisible lesions. *Lancet Neurol* 2012; 11: 272–82.
- Smith EE, Vijayappa M, Lima F, Delgado P, Wendell L, Rosand J, et al. Impaired visual evoked flow velocity response in cerebral amyloid angiopathy. *Neurology* 2008; 71: 1424–30.
- Sperling R, Salloway S, Brooks DJ, Tampieri D, Barakos J, Fox NC, et al. Amyloid-related imaging abnormalities in patients with Alzheimer's disease treated with bapineuzumab: a retrospective analysis. *Lancet Neurol* 2012; 11: 241–9.
- Sperling RA, Jack CR, Jr., Black SE, Frosch MP, Greenberg SM, Hyman BT, et al. Amyloid-related imaging abnormalities in amyloid-modifying therapeutic trials: recommendations from the Alzheimer's Association Research Roundtable Workgroup. *Alzheimer's Dement* 2011; 7: 367–85.
- Stehling C, Wersching H, Kloska SP, Kirchhof P, Ring J, Nassenstein I, et al. Detection of asymptomatic cerebral microbleeds: a comparative study at 1.5 and 3.0 T. *Acad Radiol* 2008; 15: 895–900.
- Takeda S, Hinokuma K, Yamazaki K, Onda K, Miyakawa T, Ikuta F, et al. The hemorrhage caused by sporadic-type cerebral amyloid angiopathy occurs primarily in the cerebral sulci. *Neuropathology* 2012; 32: 38–43.
- Takeda S, Yamazaki K, Miyakawa T, Onda K, Hinokuma K, Ikuta F, et al. Subcortical hematoma caused by cerebral amyloid angiopathy: does the first evidence of hemorrhage occur in the subarachnoid space? *Neuropathology* 2003; 23: 254–61.
- van Rooden S, van der Grond J, van den Boom R, Haan J, Linn J, Greenberg SM, et al. Descriptive analysis of the Boston criteria applied to a Dutch-type cerebral amyloid angiopathy population. *Stroke* 2009; 40: 3022–7.
- Vernooij MW, Ikram MA, Hofman A, Krestin GP, Breteler MMB, van der Lugt A. Superficial siderosis in the general population. *Neurology* 2009; 73: 202–5.
- Vernooij MW, Ikram MA, Wielopolski PA, Krestin GP, Breteler MM, van der Lugt A. Cerebral microbleeds: accelerated 3D T2\*-weighted GRE MR imaging versus conventional 2D T2\*-weighted GRE MR imaging for detection. *Radiology* 2008a; 248: 272–7.
- Vernooij MW, van der Lugt A, Ikram MA, Wielopolski PA, Niessen WJ, Hofman A, et al. Prevalence and risk factors of cerebral microbleeds: the Rotterdam Scan Study. *Neurology* 2008b; 70: 1208–14.
- Viswanathan A, Greenberg SM. Cerebral amyloid angiopathy in the elderly. *Ann Neurol* 2011; 70: 871–80.
- Wardlaw JM, Smith EE, Biessels GJ, Cordonnier C, Fazekas F, Frayne R, et al. Neuroimaging standards for research into small vessel disease and its contribution to ageing and neurodegeneration. *Lancet Neurol* 2013; 12: 822–38.
- Wollenweber FA, Buerger K, Mueller C, Ertl-Wagner B, Malik R, Dichgans M, et al. Prevalence of cortical superficial siderosis in patients with cognitive impairment. *J Neurol* 2014; 261: 277–82.
- Wu Z, Mittal S, Kish K, Yu Y, Hu J, Haacke EM. Identification of calcification with MRI using susceptibility-weighted imaging: a case study. *J Magn Reson Imaging* 2009; 29: 177–82.
- Zhan RY, Tong Y, Shen JF, Lang E, Preul C, Hempelmann RG, et al. Study of clinical features of amyloid angiopathy hemorrhage and hypertensive intracerebral hemorrhage. *J Zhejiang University Sci* 2004; 5: 1262–9.
- Zonneveld HI, Goos JD, Wattjes MP, Prins ND, Scheltens P, van der Flier WM, et al. Prevalence of cortical superficial siderosis in a memory clinic population. *Neurology* 2014; 82: 698–704.
